# Supplementary material for: Daily, oral FMT for long-term maintenance therapy in ulcerative colitis: results of a single-center, prospective, randomized pilot study
Source: PubMed Central journal article supplement (PMC8268596; doi:10.1186/s12876-021-01856-9), 2021-07-08

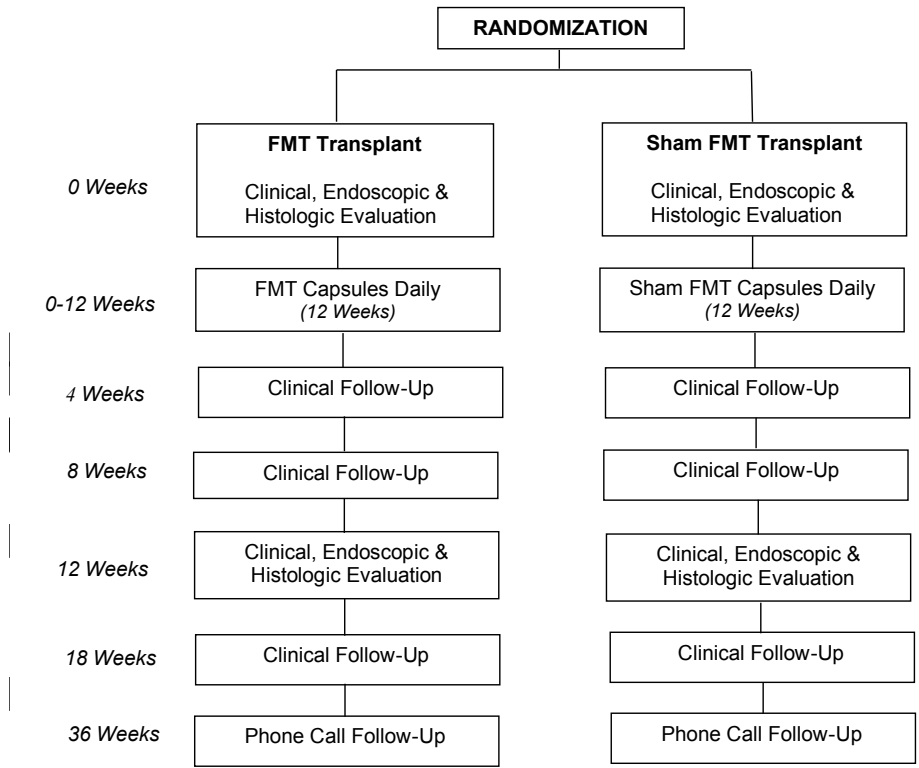

Supplement: 12876_2021_1856_MOESM1_ESM.pdf [file 12876_2021_1856_MOESM1_ESM.pdf]
